# Supplementary material
Source: PubMed Central journal article supplement (PMC3262070)

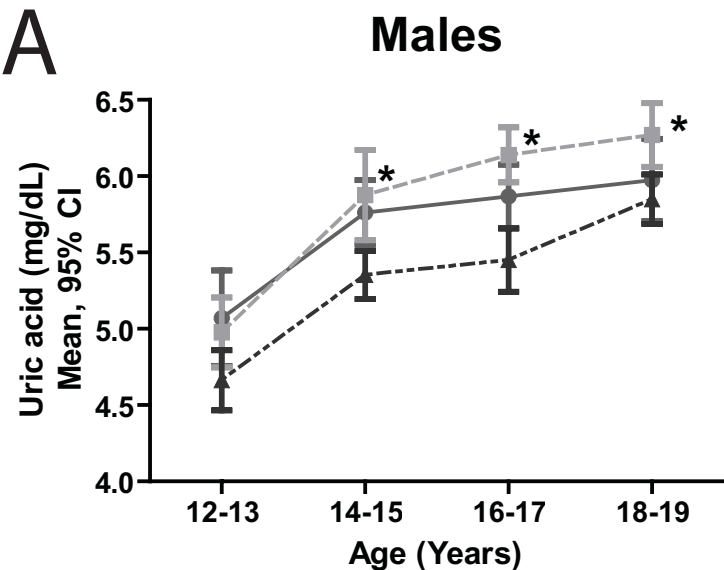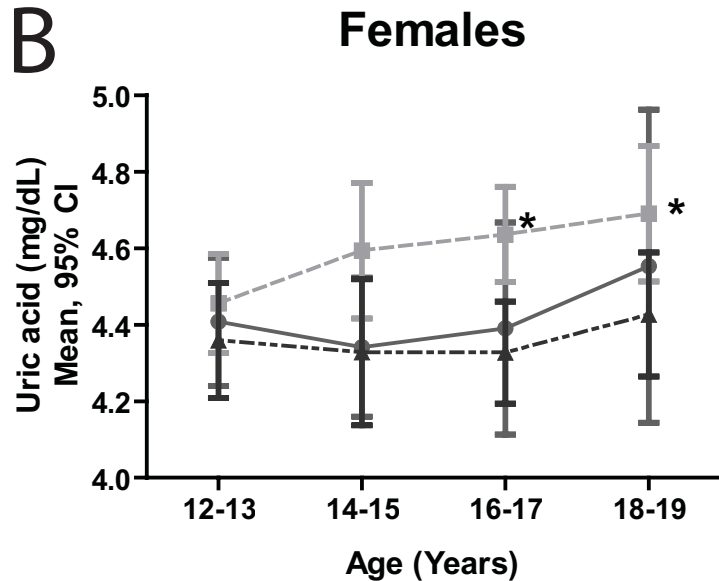

- Non-Hispanic White
- Hispanic
- ▲- Non-Hispanic Black

Supplement: NIHMS325543-supplement-02.pdf [file NIHMS325543-supplement-02.pdf]
